# Supplementary material
Source: PubMed Central journal article supplement (PMC1693831)
Supplement: pnas_0605798103_7.pdf [file pnas_0605798103_7.pdf]

**Table 7. The total numbers of of Fe- Zn- Mn- and Co-binding FSFs and FFs in the SCOP database, along with the percent at both the FSF and FF level that is ambiguous**

| <b>Metal</b> | <b>Fold Superfamilies</b> |                  | <b>Fold Families</b> |              |                  | <b># counted</b> | <b>%coverage</b> |
|--------------|---------------------------|------------------|----------------------|--------------|------------------|------------------|------------------|
|              | <b>Total</b>              | <b>ambiguous</b> | <b>metal</b>         | <b>Total</b> | <b>ambiguous</b> |                  |                  |
| <b>Fe</b>    | 78                        | 36               | <b>Fe</b>            | 118          | 11               | 107              | 90.7             |
| <b>Zn</b>    | 130                       | 61               | <b>Zn</b>            | 189          | 9                | 180              | 95.2             |
| <b>Mn</b>    | 26                        | 16               | <b>Mn</b>            | 33           | 4                | 29               | 87.9             |
| <b>Co</b>    | 12                        | 8                | <b>Co</b>            | 15           | 6                | 9                | 60.0             |

To be considered ambiguous, either the FFs or domains in a FSF, or the domains in a FF do not agree in terms of metal binding. For example, the ferritin FSF is ambiguous as the daughter categories include both Fe- (e.g. ferritins) and Mn-binding (e.g. Mn chelatase) FFs, but the FFs in the ferritin FSF are not ambiguous.
