# Supplementary material
Source: PubMed Central journal article supplement (PMC1693831)
Supplement: pnas_0605798103_8.pdf [file pnas_0605798103_8.pdf]

**Table 8. The SCOP IDs of the “small protein” Zn-binding FFs within each category of the Venn diagram from Fig. 3B**

| Occurs in at least one proteome |           |           |           | Occurs in >50% |          |           |
|---------------------------------|-----------|-----------|-----------|----------------|----------|-----------|
| All                             | B+E       | A+E       | E         | A+E            | A        | E         |
| g.39.1.7                        | g.39.1.11 | g.39.1.6  | g.37.1.1  | g.39.1.6       | g.41.7.1 | g.37.1.1  |
| g.41.1.1                        | g.39.1.13 | g.41.11.1 | g.37.1.2  | g.41.1.1       |          | g.37.1.4  |
| g.41.2.1                        | g.39.1.8  | g.41.3.1  | g.37.1.3  | g.41.3.1       |          | g.39.1.1  |
| g.41.3.2                        | g.44.1.1  | g.41.7.1  | g.37.1.4  | g.41.8.1       |          | g.39.1.12 |
| g.41.3.3                        | g.48.1.1  | g.41.8.1  | g.38.1.1  | g.41.8.2       |          | g.39.1.3  |
| g.54.1.1                        |           | g.41.8.2  | g.39.1.1  | g.41.8.3       |          | g.39.1.7  |
| g.74.1.1                        |           | g.41.8.3  | g.39.1.10 | g.41.8.4       |          | g.40.1.1  |
|                                 |           | g.41.8.4  | g.39.1.12 | g.54.1.1       |          | g.41.10.1 |
|                                 |           | g.50.1.1  | g.39.1.2  | g.59.1.1       |          | g.41.11.1 |
|                                 |           | g.50.1.2  | g.39.1.3  |                |          | g.41.2.1  |
|                                 |           | g.59.1.1  | g.39.1.4  |                |          | g.41.4.1  |
|                                 |           |           | g.39.1.5  |                |          | g.44.1.1  |
|                                 |           |           | g.39.1.9  |                |          | g.49.1.1  |
|                                 |           |           | g.40.1.1  |                |          | g.49.1.2  |
|                                 |           |           | g.41.10.1 |                |          | g.50.1.1  |
|                                 |           |           | g.41.12.1 |                |          | g.50.1.2  |
|                                 |           |           | g.41.4.1  |                |          | g.52.1.1  |
|                                 |           |           | g.43.1.1  |                |          | g.66.1.1  |
|                                 |           |           | g.46.1.1  |                |          |           |
|                                 |           |           | g.47.1.1  |                |          |           |
|                                 |           |           | g.49.1.1  |                |          |           |
|                                 |           |           | g.49.1.2  |                |          |           |
|                                 |           |           | g.49.1.3  |                |          |           |
|                                 |           |           | g.52.1.1  |                |          |           |
|                                 |           |           | g.53.1.1  |                |          |           |
|                                 |           |           | g.62.1.1  |                |          |           |
|                                 |           |           | g.66.1.1  |                |          |           |
|                                 |           |           | g.67.1.1  |                |          |           |
|                                 |           |           | g.72.1.1  |                |          |           |
|                                 |           |           | g.73.1.1  |                |          |           |
