# Supplementary material
Source: PubMed Central journal article supplement (PMC1693831)
Supplement: pnas_0605798103_9.pdf [file pnas_0605798103_9.pdf]

**Table 9. Fe binding within Bacteria**

|                   | <b>Aerobic Bact.</b> | <b>Anaer. Bact.</b> | <b>Facultative. Bact.</b> |
|-------------------|----------------------|---------------------|---------------------------|
| <b>Fe-S</b>       | 46 ± 8               | 59 ± 8              | 43 ± 13                   |
| <b>Heme</b>       | 29 ± 11              | 16 ± 10             | 19 ± 12                   |
| <b>Amino acid</b> | 27 ± 10              | 24 ± 9              | 37 ± 20                   |

Shown are the averages and standard deviations of the percent of the Fe-binding portion of a proteome that binds Fe via Fe-S, heme, or amino-acid bonds for aerobic, anaerobic, and facultative Bacteria.
