# Supplementary material
Source: PubMed Central journal article supplement (PMC1693831)

Concentration  
(O<sub>2</sub> in arbitrary units, Zn and Fe in moles L<sup>-1</sup>)

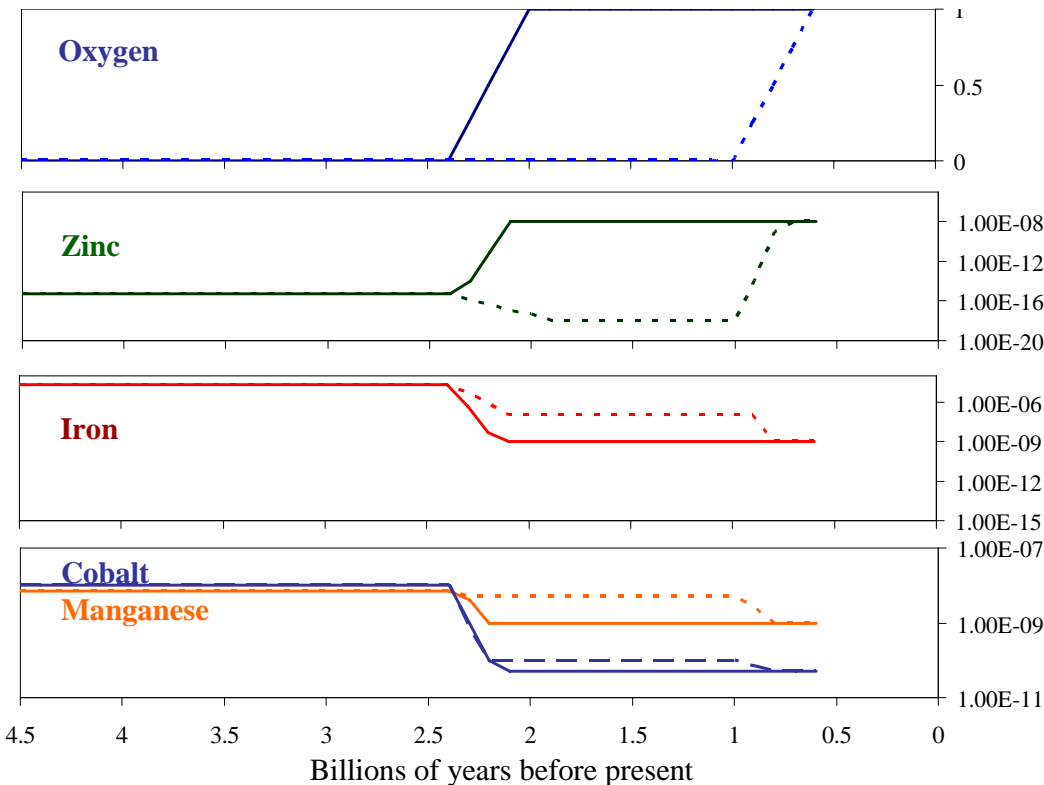

Supplement: pnas_0605798103_1.pdf [file pnas_0605798103_1.pdf]

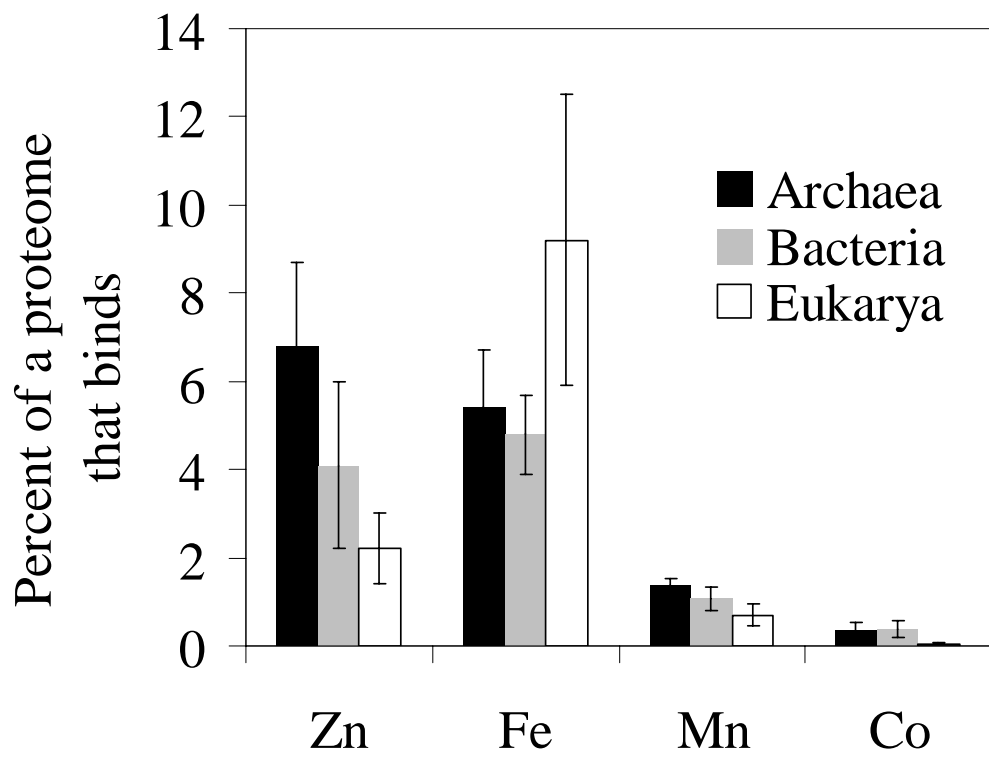

Supplement: pnas_0605798103_2.pdf [file pnas_0605798103_2.pdf]

Total number of assigned domains

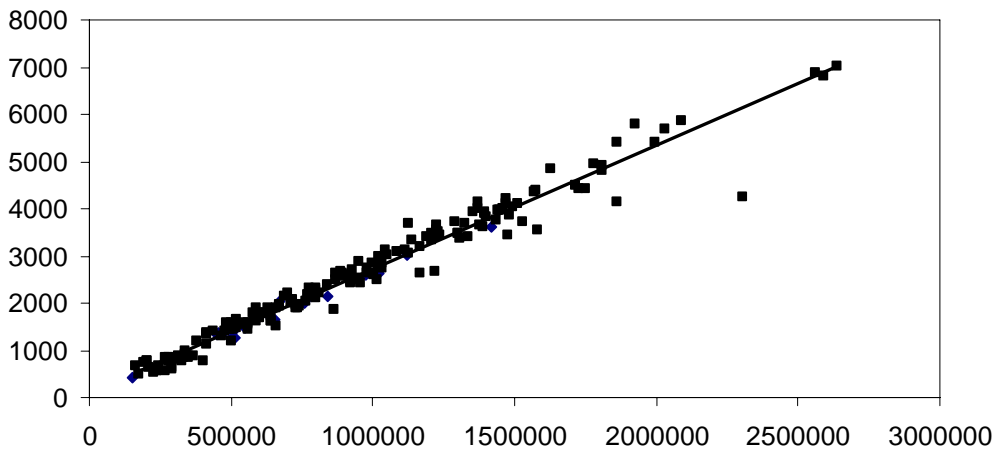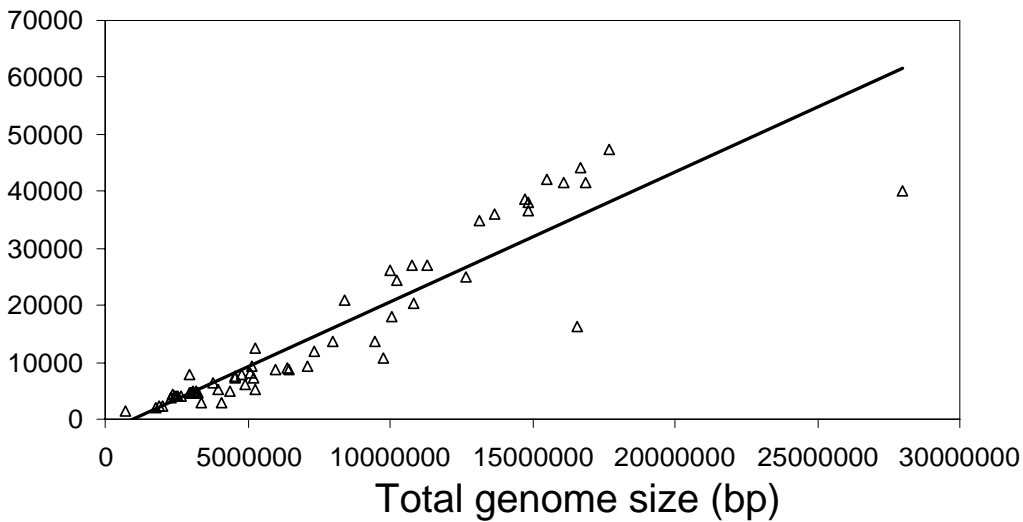

Supplement: pnas_0605798103_3.pdf [file pnas_0605798103_3.pdf]

Metal binding domains in a proteome

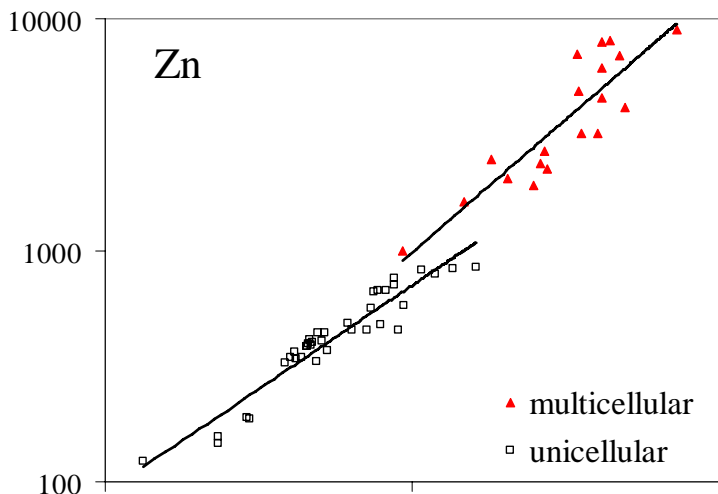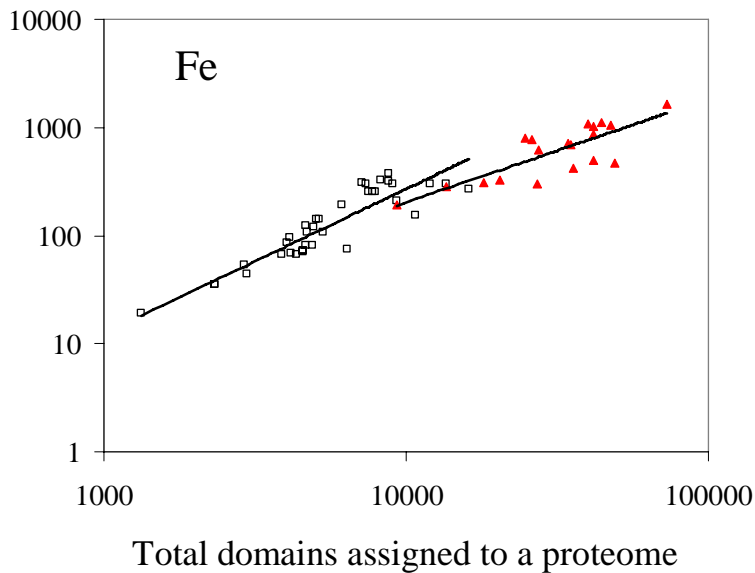

Supplement: pnas_0605798103_4.pdf [file pnas_0605798103_4.pdf]

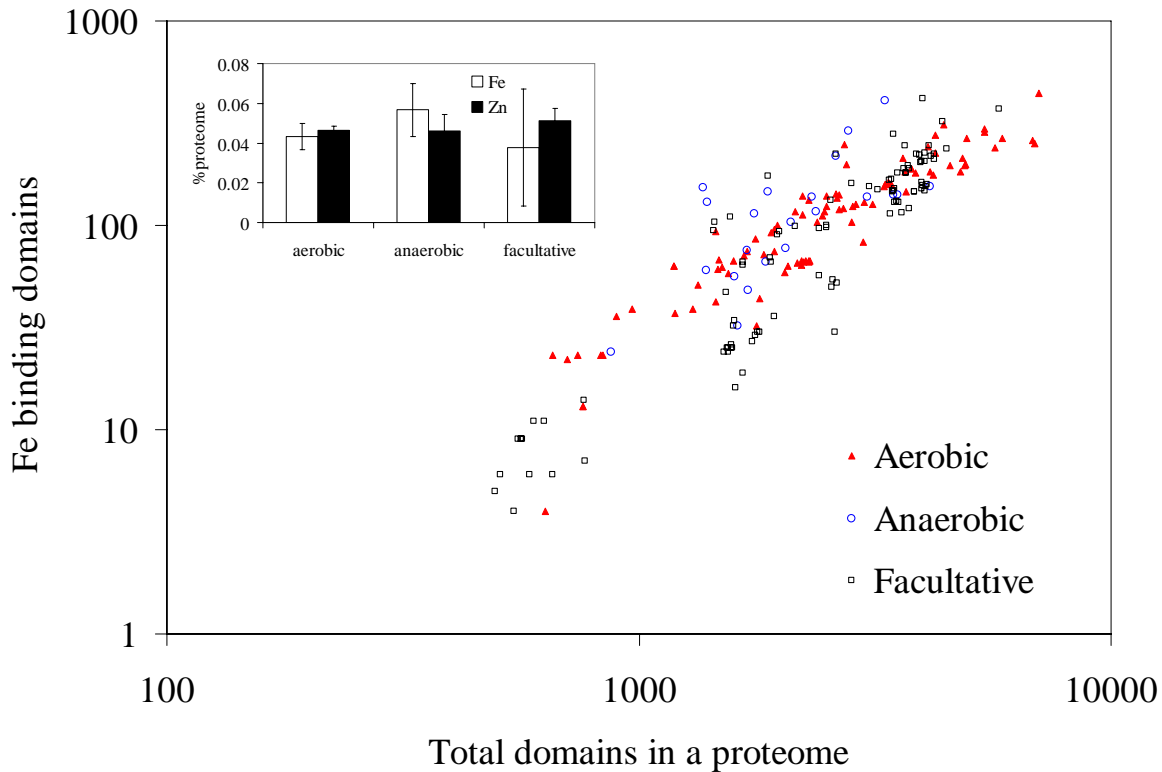

Supplement: pnas_0605798103_5.pdf [file pnas_0605798103_5.pdf]

Fe binding domains

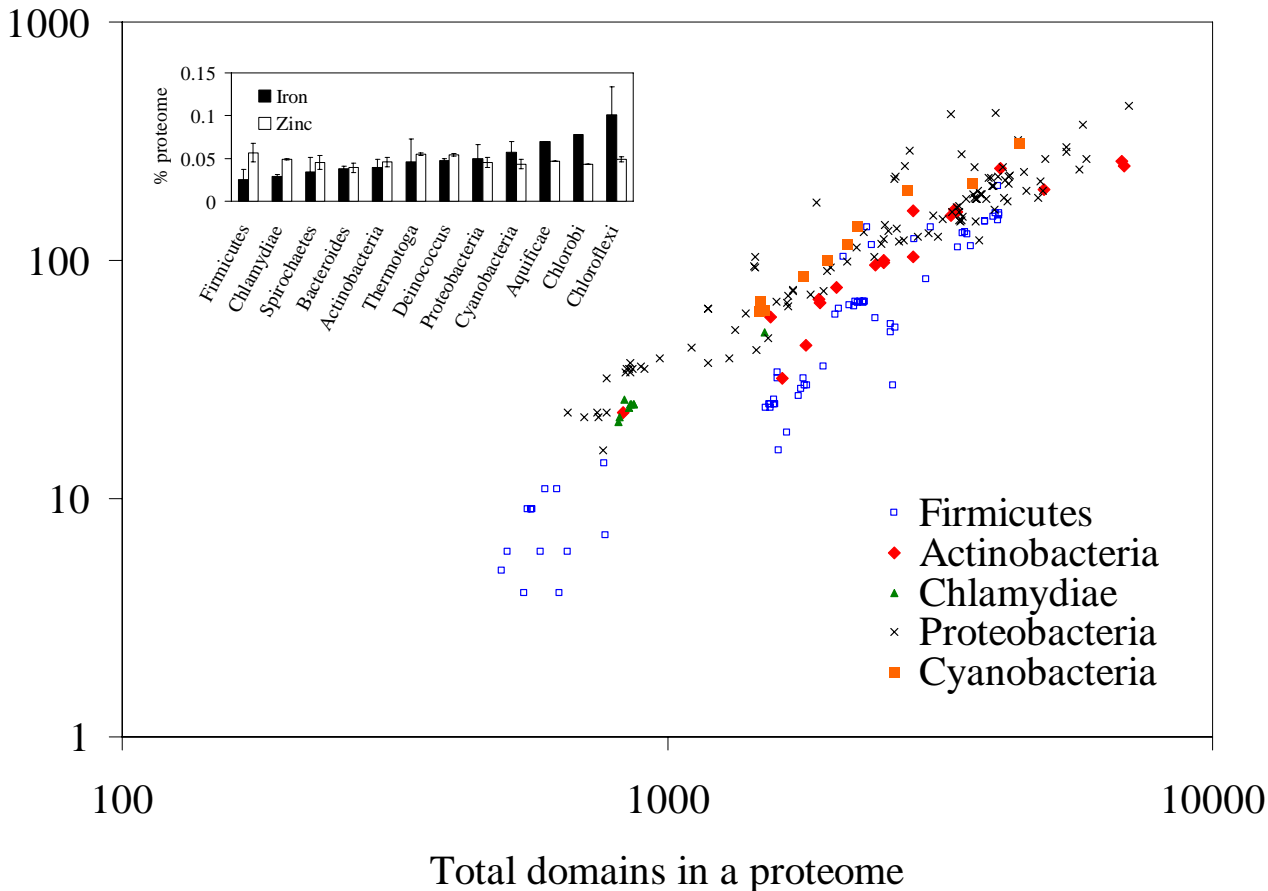

Supplement: pnas_0605798103_6.pdf [file pnas_0605798103_6.pdf]
